# Supplementary material
Source: PubMed Central journal article supplement (PMC8108270)
Supplement: NIHMS1678921-supplement-Supplementary_Materials.pdf [file NIHMS1678921-supplement-Supplementary_Materials.pdf]

# Supplementary Materials

## Supplementary Bibliography

### I-Circadian Organization of Physiology

#### Circadian Pacemaker Neurons

- Mohawk JA, Takahashi JS. Cell autonomy and synchrony of suprachiasmatic nucleus circadian oscillators. *Trends Neurosci* 2011;34:349-58.
- Patton AP, Hastings MH. The suprachiasmatic nucleus. *Curr Biol* 2018;28:R816-R22.
- Kuhlman SJ, McMahon DG. Encoding the ins and outs of circadian pacemaking. *J Biol Rhythms* 2006;21:470-81.
- Harvey JRM, Plante AE, Meredith AL. Ion Channels Controlling Circadian Rhythms in Suprachiasmatic Nucleus Excitability. *Physiol Rev* 2020;100:1415-54.
- Ceriani MF, Hogenesch JB, Yanovsky M, Panda S, Straume M, Kay SA. Genome-wide expression analysis in *Drosophila* reveals genes controlling circadian behavior. *J Neurosci* 2002;22:9305-19.
- Lazzerini Ospri L, Prusky G, Hattar S. Mood, the Circadian System, and Melanopsin Retinal Ganglion Cells. *Annu Rev Neurosci* 2017;40:539-56.
- Tosini G, Ferguson I, Tsubota K. Effects of blue light on the circadian system and eye physiology. *Mol Vis* 2016;22:61-72.
- Coomans CP, Ramkisoensing A, Meijer JH. The suprachiasmatic nuclei as a seasonal clock. *Front Neuroendocrinol* 2015;37:29-42.
- Buijs RM, Guzman Ruiz MA, Mendez Hernandez R, Rodriguez Cortes B. The suprachiasmatic nucleus; a responsive clock regulating homeostasis by daily changing the setpoints of physiological parameters. *Auton Neurosci* 2019;218:43-50.
- Brancaccio M, Edwards MD, Patton AP, et al. Cell-autonomous clock of astrocytes drives circadian behavior in mammals. *Science* 2019;363:187-92.

#### II-Molecular Circuitry of the Circadian Clock

- Lim C, Allada R. Emerging roles for post-transcriptional regulation in circadian clocks. *Nat Neurosci* 2013;16:1544-50.

#### A network of peripheral tissue clocks drives rhythmic physiology

- Rey G, Cesbron F, Rougemont J, Reinke H, Brunner M, Naef F. Genome-wide and phase-specific DNA-binding rhythms of BMAL1 control circadian output functions in mouse liver. *PLoS Biol* 2011;9:e1000595.

#### Peripheral clocks can be entrained by metabolic cues

- Gu YZ, Hogenesch JB, Bradfield CA. The PAS superfamily: sensors of environmental and developmental signals. *Annu Rev Pharmacol Toxicol* 2000;40:519-61.
- Peek CB. Metabolic Implications of Circadian-HIF Crosstalk. *Trends Endocrinol Metab* 2020;31:459-68.
- Everett LJ, Lazar MA. Nuclear receptor Rev-erb $\alpha$ : up, down, and all around. *Trends Endocrinol Metab* 2014;25:586-92.
- Shea SA, Hilton MF, Hu K, Scheer FA. Existence of an endogenous circadian blood pressure rhythm in humans that peaks in the evening. *Circ Res* 2011;108:980-4.

### **III-Circadian Disruption Contributes to Human Disease**

Fernandez DC, Fogerson PM, Lazzerini Ospri L, et al. Light Affects Mood and Learning through Distinct Retina-Brain Pathways. *Cell* 2018;175:71-84 e18.

#### **Sleep Disorders**

Sack RL. Clinical practice. Jet lag. *N Engl J Med* 2010;362:440-7.

Recht LD, Lew RA, Schwartz WJ. Baseball teams beaten by jet lag. *Nature* 1995;377:583.

Song A, Severini T, Allada R. How jet lag impairs Major League Baseball performance. *Proc Natl Acad Sci U S A* 2017;114:1407-12.

Abbott SM, Reid KJ, Zee PC. Circadian Rhythm Sleep-Wake Disorders. *Psychiatr Clin North Am* 2015;38:805-23.

Ashbrook LH, Krystal AD, Fu YH, Ptacek LJ. Genetics of the human circadian clock and sleep homeostat. *Neuropsychopharmacology* 2020;45:45-54.

Xu Y, Padiath QS, Shapiro RE, et al. Functional consequences of a CK1delta mutation causing familial advanced sleep phase syndrome. *Nature* 2005;434:640-4.

Archer SN, Carpen JD, Gibson M, et al. Polymorphism in the PER3 promoter associates with diurnal preference and delayed sleep phase disorder. *Sleep* 2010;33:695-701.

Ptacek LJ, Jones CR, Fu YH. Novel insights from genetic and molecular characterization of the human clock. *Cold Spring Harb Symp Quant Biol* 2007;72:273-7.

Oren DA, Wehr TA. Hypernyctohemeral syndrome after chronotherapy for delayed sleep phase syndrome. *NEJM* 1992 Dec 10;327(24):1762.

#### **Clocks in psychiatric and neurodegenerative disease**

Musiek ES, Holtzman DM. Mechanisms linking circadian clocks, sleep, and neurodegeneration. *Science* 2016;354:1004-8.

Bao AM, Meynen G, Swaab DF. The stress system in depression and neurodegeneration: focus on the human hypothalamus. *Brain Res Rev* 2008;57:531-53.

Lananna BV, Musiek ES. The wrinkling of time: Aging, inflammation, oxidative stress, and the circadian clock in neurodegeneration. *Neurobiol Dis* 2020;139:104832.

Coogan AN, McGowan NM. A systematic review of circadian function, chronotype and chronotherapy in attention deficit hyperactivity disorder. *Atten Defic Hyperact Disord* 2017;9:129-47.

Robillard R, Hermens DF, Lee RS, et al. Sleep-wake profiles predict longitudinal changes in manic symptoms and memory in young people with mood disorders. *J Sleep Res* 2016;25:549-55.

Kelly RM, Healy U, Sreenan S, McDermott JH, Coogan AN. Clocks in the clinic: circadian rhythms in health and disease. *Postgrad Med J* 2018;94:653-8.

Ketchesin KD, Becker-Krail D, McClung CA. Mood-related central and peripheral clocks. *Eur J Neurosci* 2020;51:326-45.

Albrecht U. Molecular Connections Between Circadian Clocks and Mood-related Behaviors. *Journal of molecular biology* 2020;432:3714-21.

Yang S, Van Dongen HP, Wang K, Berrettini W, Bucan M. Assessment of circadian function in fibroblasts of patients with bipolar disorder. *Mol Psychiatry* 2009;14:143-55.

Ehlers CL, Frank E, Kupfer DJ. Social zeitgebers and biological rhythms. A unified approach to understanding the etiology of depression. *Arch Gen Psychiatry* 1988;45:948-52.

McClung CA. Circadian rhythms and mood regulation: insights from pre-clinical models. *Eur Neuropsychopharmacol* 2011;21 Suppl 4:S683-93.

McCarthy MJ, Nievergelt CM, Kelsoe JR, Welsh DK. A survey of genomic studies supports association of circadian clock genes with bipolar disorder spectrum illnesses and lithium response. *PLoS One* 2012;7:e32091.

Chen J, Okimura K, Yoshimura T. Light and Hormones in Seasonal Regulation of Reproduction and Mood. *Endocrinology* 2020;161.

### **Clocks in cancer**

- Masri S, Sassone-Corsi P. The emerging link between cancer, metabolism, and circadian rhythms. *Nat Med* 2018;24:1795-803.
- Yousef E, Mitwally N, Noufal N, Tahir MR. Shift work and risk of skin cancer: A systematic review and meta-analysis. *Scientific reports* 2020;10:2012.
- Fu L, Lee CC. The circadian clock: pacemaker and tumour suppressor. *Nature reviews Cancer* 2003;3:350-61.
- Puram RV, Kowalczyk MS, de Boer CG, et al. Core Circadian Clock Genes Regulate Leukemia Stem Cells in AML. *Cell* 2016;165:303-16.
- Etchegaray JP, Mostoslavsky R. Interplay between Metabolism and Epigenetics: A Nuclear Adaptation to Environmental Changes. *Molecular cell* 2016;62:695-711.

### **Clocks in infection, inflammation and cardiovascular disease**

- Scheiermann C, Kunisaki Y, Lucas D, et al. Adrenergic nerves govern circadian leukocyte recruitment to tissues. *Immunity* 2012;37:290-301.
- Nakamura TJ, Nakamura W, Yamazaki S, et al. Age-related decline in circadian output. *J Neurosci* 2011;31:10201-5.
- Buttgereit F, Smolen JS, Coogan AN, Cajochen C. Clocking in: chronobiology in rheumatoid arthritis. *Nat Rev Rheumatol* 2015;11:349-56.
- Hong HK, Maury E, Ramsey KM, et al. Requirement for NF-kappaB in maintenance of molecular and behavioral circadian rhythms in mice. *Genes Dev* 2018;32:1367-79.
- Pariollaud M, Gibbs JE, Hopwood TW, et al. Circadian clock component REV-ERBalpha controls homeostatic regulation of pulmonary inflammation. *J Clin Invest* 2018;128:2281-96.
- Viswambharan H, Carvas JM, Antic V, et al. Mutation of the circadian clock gene *Per2* alters vascular endothelial function. *Circulation* 2007;115:2188-95.
- Bowles NP, Thosar SS, Herzig MX, Shea SA. Chronotherapy for Hypertension. *Curr Hypertens Rep* 2018;20:97.
- Pan X, Jiang XC, Hussain MM. Impaired cholesterol metabolism and enhanced atherosclerosis in clock mutant mice. *Circulation* 2013;128:1758-69.
- Anea CB, Zhang M, Stepp DW, et al. Vascular disease in mice with a dysfunctional circadian clock. *Circulation* 2009;119:1510-7.

### **Circadian clocks in glucose homeostasis and time restricted feeding**

- Mason IC, Qian J, Adler GK, Scheer F. Impact of circadian disruption on glucose metabolism: implications for type 2 diabetes. *Diabetologia* 2020;63:462-72.
- Chiechio S, Zammataro M, Morales ME, et al. Epigenetic modulation of mGlu2 receptors by histone deacetylase inhibitors in the treatment of inflammatory pain. *Mol Pharmacol* 2009;75:1014-20.
- Campbell PJ, Bolli GB, Cryer PE, Gerich JE. Pathogenesis of the dawn phenomenon in patients with insulin-dependent diabetes mellitus. Accelerated glucose production and impaired glucose utilization due to nocturnal surges in growth hormone secretion. *N Engl J Med* 1985;312:1473-9.
- Van Cauter E, Polonsky KS, Scheen AJ. Roles of circadian rhythmicity and sleep in human glucose regulation. *Endocr Rev* 1997;18:716-38.
- Bonnefond A, Froguel P. Disentangling the Role of Melatonin and its Receptor MTNR1B in Type 2 Diabetes: Still a Long Way to Go? *Curr Diab Rep* 2017;17:122.
- de Cabo R, Mattson MP. Effects of Intermittent Fasting on Health, Aging, and Disease. *N Engl J Med* 2019;381:2541-51.

#### **IV-Clocks from cell mechanisms to diagnostics and therapeutics**

Wittenbrink N, Ananthasubramaniam B, Munch M, et al. High-accuracy determination of internal circadian time from a single blood sample. *J Clin Invest* 2018;128:3826-39.

Kasukawa T, Sugimoto M, Hida A, et al. Human blood metabolite timetable indicates internal body time. *Proc Natl Acad Sci U S A* 2012;109:15036-41.

Ruben MD, Smith DF, FitzGerald GA, Hogenesch JB. Dosing time matters. *Science* 2019;365:547-9.

Plakogiannis R, Cohen H. Optimal low-density lipoprotein cholesterol lowering--morning versus evening statin administration. *Ann Pharmacother* 2007;41:106-10.
